# Supplementary material
Source: Springer Nature journal article supplement (https://www.springermedizin.de/resource/supplementary/12916_2010_323_MOESM14_ESM.pdf/9599638)

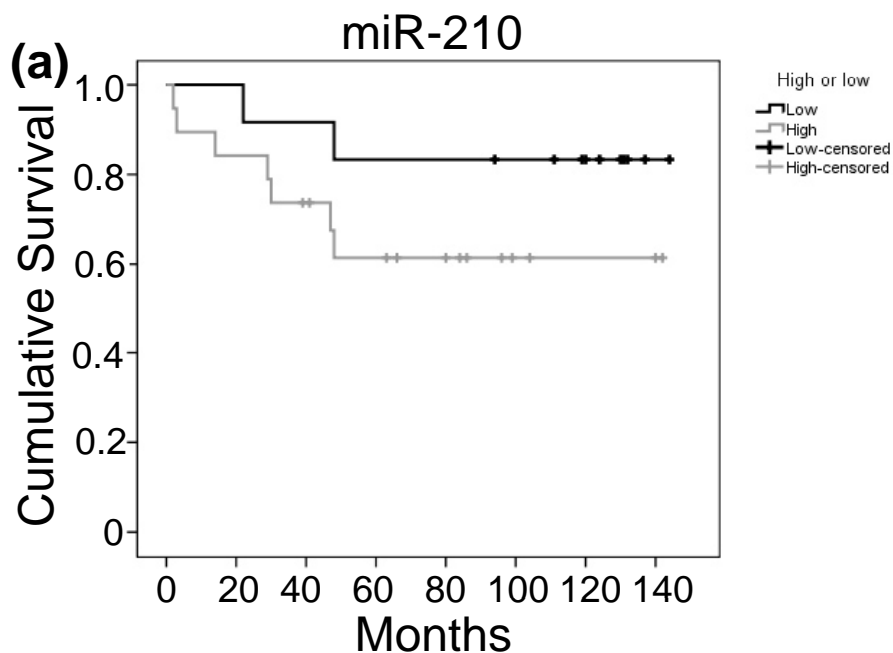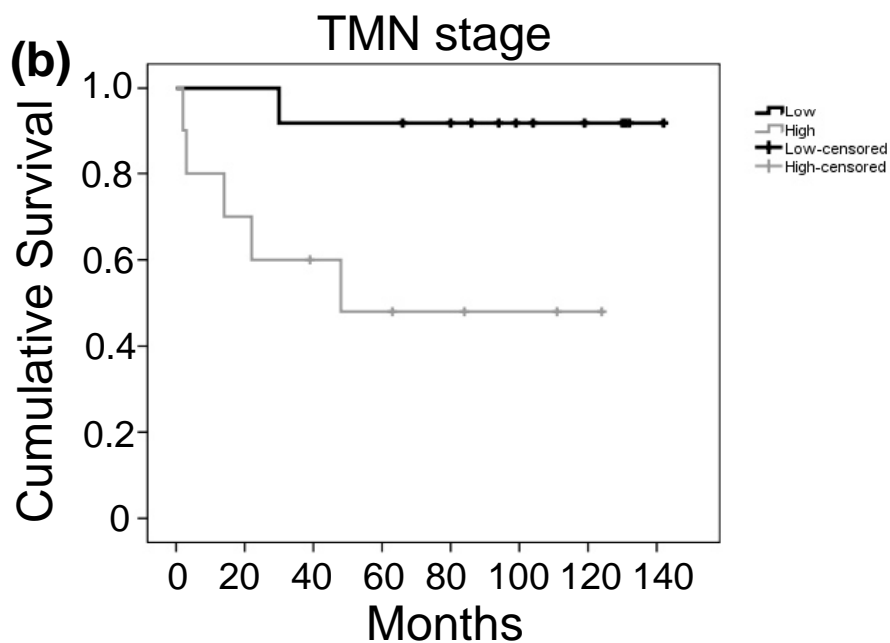

Supplement: MOESM14 [file 9599638]
